# Supplementary material for: Biocompatible nano hydroxyapatite – curcumin bi-coated antibacterial activated carbon for water purification
Source: Royal Society of Chemistry journal article supplement (doi:10.1039/c5ra11518c), 2015-01-01
Supplement: c5ra11518c1.pdf [file c5ra11518c1.pdf]

## Biocompatible nano hydroxyapatite– curcumin bi-coated antibacterial activated carbon for water purification

K. S. Malsha Udayakantha, Rohini M. de Silva, K. M. Nalin de Silva, Chamari Hettiarachchi

### Supporting Material

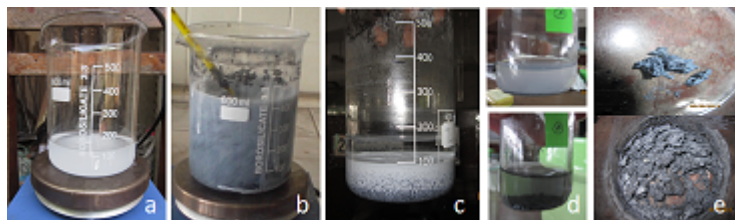

Diagrammatic synthetic procedure of HAP coated GAC synthesis. a) before addition of ammonia b) after addition of ammonia and GAC c) after oven drying d) washing steps e) final product

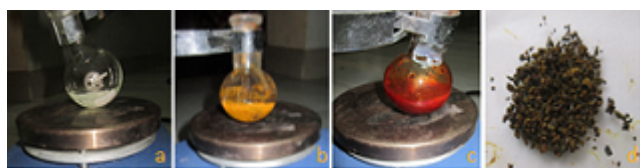

Diagrammatic synthetic procedure of HAP-Curcumin bi-coated GAC. a) before addition of Curcumin b) after addition of Curcumin c) after addition of ammonia d) final product

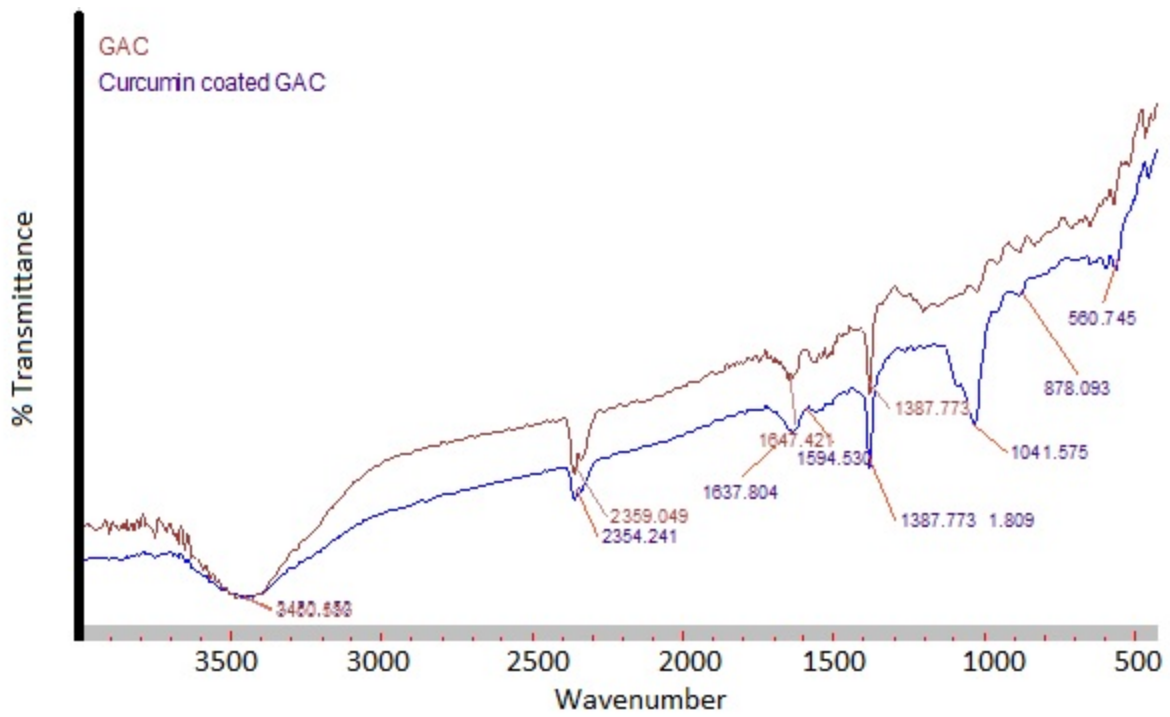

FT-IR spectra of GAC (red/top) and Curcumin coated GAC (blue/bottom)

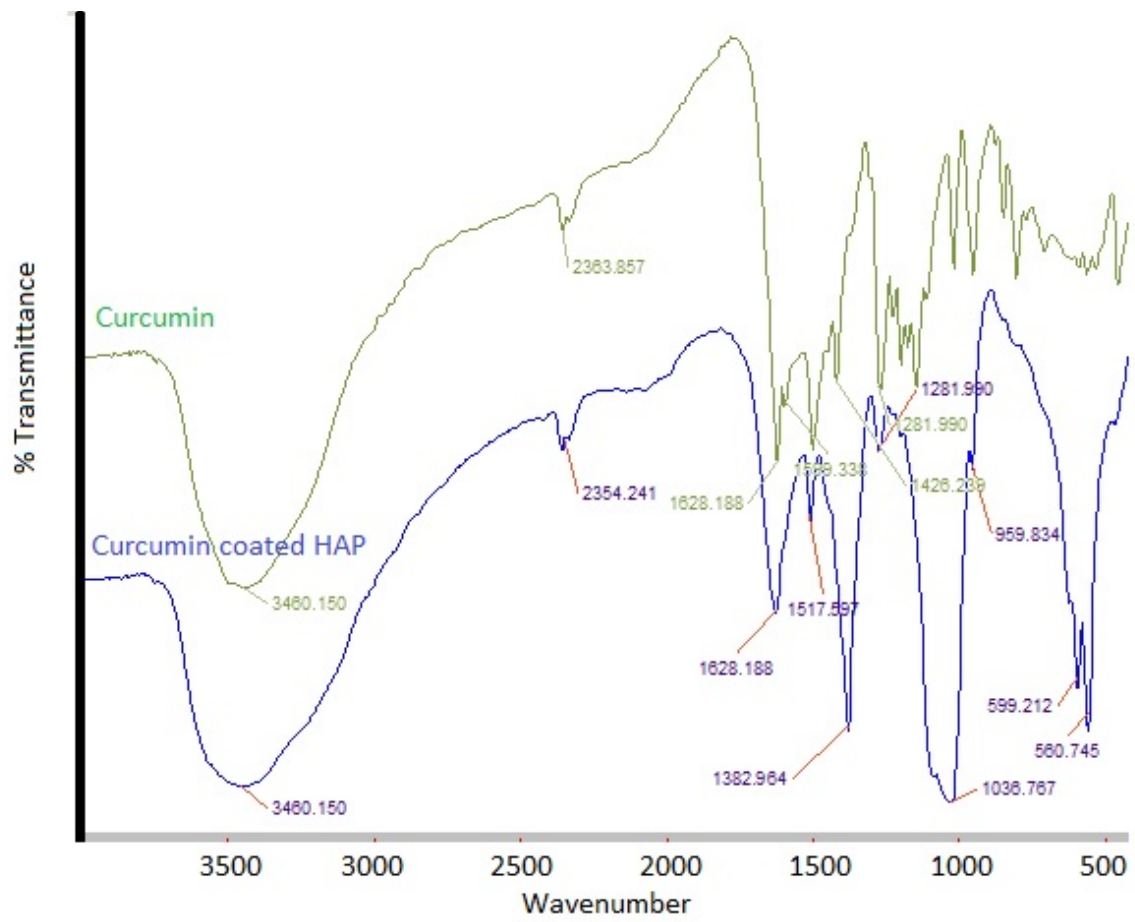

FT-IR spectra of Curcumin and Curcumin coated HAP
